# Supplementary material for: Comment on “Aqueous SET-LRP catalyzed with in situ generated Cu(0) demonstrates surface mediated activation and bimolecular termination” by S. Samanta, et al., Polym. Chem., 2015, 6, 2084
Source: Royal Society of Chemistry journal article supplement (doi:10.1039/c5py00444f), 2015-01-01
Supplement: c5py00444f1.pdf [file c5py00444f1.pdf]

**Electronic Supplementary Information for ‘Comment on “Aqueous SET-LRP catalyzed with in situ generated Cu(0) demonstrates surface mediated activation and bimolecular termination” by S. Samanta et al., Polym. Chem. 2015, 6, 2084’**

S. Harrison

**Details of non-linear least squares fitting procedure.**

Conversion and residual functionality ( $f_{PBR}$ ) data were read from Fig. 8b of reference 1, and are shown in Table S1.

**Table S1.** Conversion and residual functionality ( $f_{PBR}$ ) data from Fig. 8b of reference 1, and results of NLLS fitting assuming error in both variables with  $k_t/k_p^2 = 0.047$ .

| conversion         | $f_{PBR}$ | fitted conversion | fitted $f_{PBR}$ | point of closest approach | distance to model curve |
|--------------------|-----------|-------------------|------------------|---------------------------|-------------------------|
| 0.22               | 1.00      | 0.00              | 0.99             | (0.22, 0.99)              | 0.010                   |
| 0.34               | 1.00      | 0.00              | 0.98             | (0.34, 0.98)              | 0.017                   |
| 0.77               | 0.91      | 0.90              | 0.94             | (0.78, 0.94)              | 0.031                   |
| 0.83               | 0.89      | 0.94              | 0.92             | (0.84, 0.93)              | 0.038                   |
| 0.999 <sup>a</sup> | 0.88      | 0.95              | 0.72             | (0.97, 0.86)              | 0.035                   |

<sup>a</sup> A value of 0.999 was used to represent 100% conversion.

The data were fitted to the following single-parameter model:

$$\hat{f}_{PBR} = \frac{4.61}{60 \times 0.09} \times a \ln(1 - conv)$$

Equivalently,

$$conv = 1 - e^{-\frac{60 \times 0.09}{4.61} \frac{f_{PBR}}{a}}$$

In each equation,  $a$  is the parameter to be fitted and represents the value of  $k_p/k_t^2$ . Using these equations, fitted values of conversion and  $f_{PBR}$  can be obtained from experimental values of  $f_{PBR}$  and conversion, respectively.

The fitting procedure is carried out with the aim of minimizing the sum of squared residuals,  $\sum r^2$ , assuming an error of similar magnitude in both variables. The distance,  $r$ , between the model curve and a data point  $(x,y)$  (Figure S1) is approximately given by:

$$r^2 \approx \frac{(\Delta y)^2}{1 + \left(\frac{\Delta y}{\Delta x}\right)^2}$$

This is equivalent to carrying out a conventional non-linear least squared fit, assuming negligible error in conversion, with the residuals weighted by a factor of  $\sqrt{\frac{1}{1 + \left(\frac{\Delta y}{\Delta x}\right)^2}}$ .

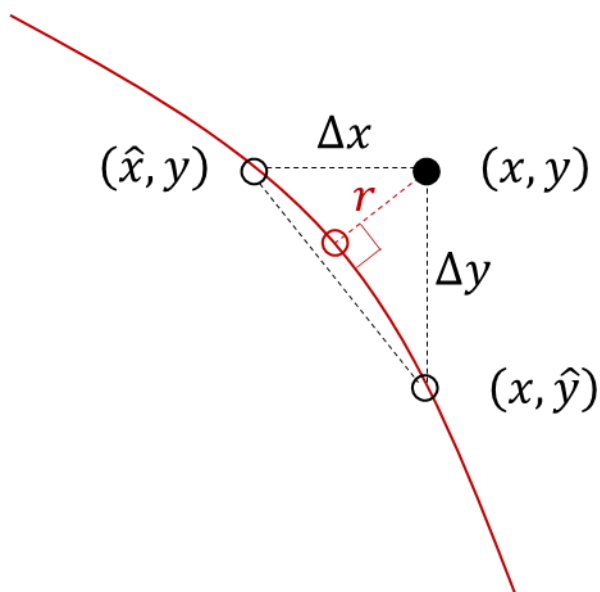

**Figure S1.** Relationship between distance between experimental data point and model curve,  $r$ , and distances between experimental and fitted data points,  $\Delta x$  and  $\Delta y$ .

Fitting was carried out by an iterative procedure, in which an initial estimate of  $a$  was used to generate a new estimate by solving the matrix equation

$$\Delta a = (\mathbf{J}^T \mathbf{W} \mathbf{J})^{-1} \cdot \mathbf{J}^T \mathbf{W} \Delta \mathbf{y}$$

Where  $\mathbf{J}$  is the Jacobian matrix whose elements are given by

$$J_i = \left( \frac{\partial \hat{f}_{PBr}}{\partial a} \right)_i$$

$\mathbf{W}$  is the weight matrix

$$W_{ii} = \frac{1}{1 + \left( \frac{\Delta y}{\Delta x} \right)_i^2}$$

$$W_{ij} = 0 \quad (i \neq j)$$

and  $\Delta \mathbf{y}$  is the vector of residuals

$$\Delta y_i = f_{PBr,i} - \hat{f}_{PBr,i}$$

The new value of  $a$  was obtained by adding  $\Delta a$  to the previous value until the difference between iterations was less than  $1 \times 10^{-5}$ . This procedure gave a best estimate for  $a$  of  $0.0468 \text{ s} \cdot \text{mol} \cdot \text{L}^{-1}$ .

The standard error in  $a$  can be estimated from

$$se_a = \sqrt{\frac{(\mathbf{J}^T \mathbf{W} \mathbf{J})^{-1} \Delta \mathbf{y}^T \mathbf{W} \Delta \mathbf{y}}{n - 1}}$$

where  $n$  is the number of observations (5 in this case).

The standard error in  $a$  was thus estimated at  $0.0133 \text{ s}\cdot\text{mol}\cdot\text{L}^{-1}$ . Figure S2 shows the curve of best fit ( $k_p/k_t^2 = 0.0468$ ) together with the curves corresponding to  $k_p/k_t^2 = 0.0468 \pm 0.0133$ . The probability that the true value of  $k_t/k_p^2$  falls in this range is approximately 70%.

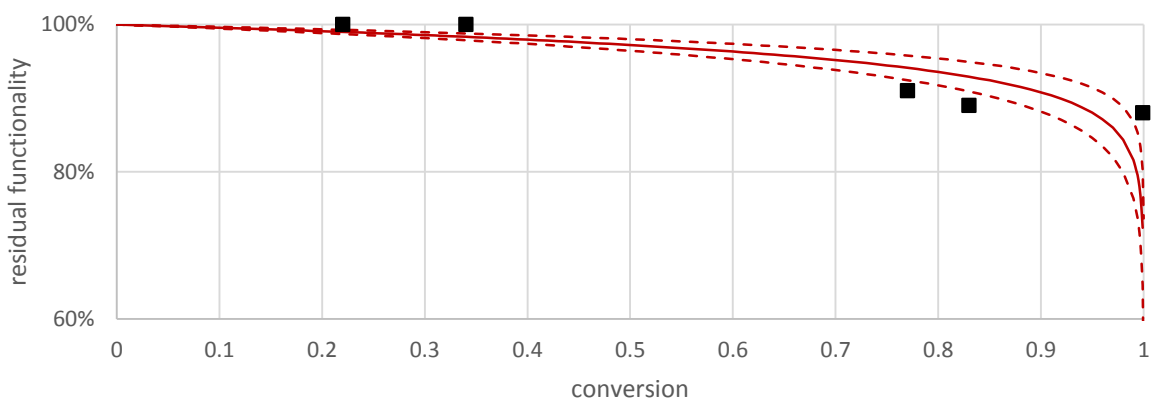

**Figure S2.** Curve of best fit (solid line) to experimental residual functionality and conversion data from reference 1, Fig. 8b, with curves corresponding to best estimate of  $k_t/k_p^2$  plus or minus the standard error (dashed lines).

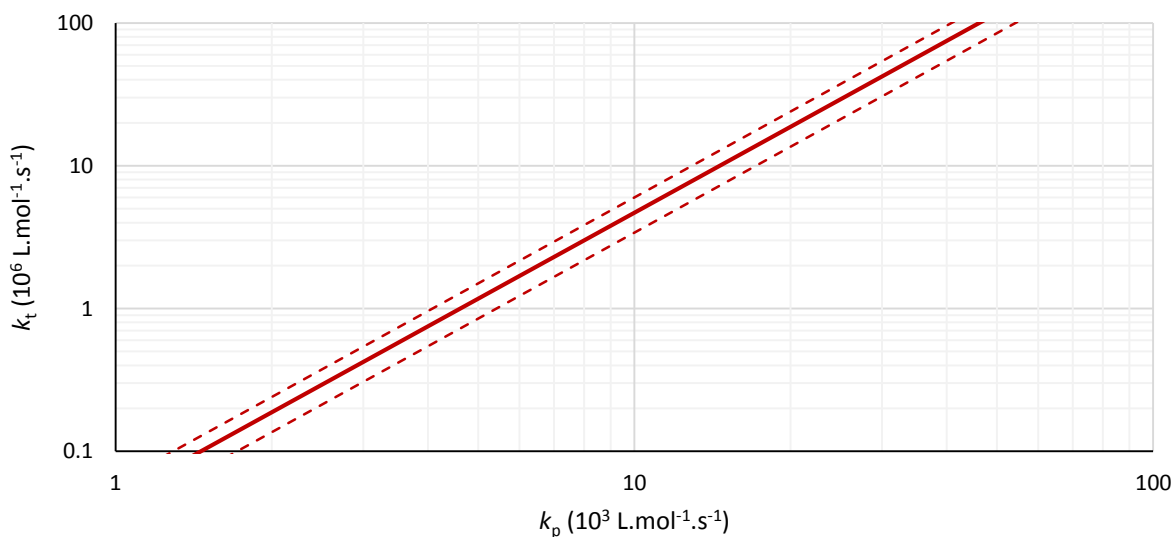

**Figure S3.** Values of  $k_p$  and  $k_t$  which are consistent with the experimental data shown in Figure S2. Solid line indicates values of  $k_p$  and  $k_t$  which satisfy  $k_t/k_p^2 = 0.0468$ . Dashed lines correspond to  $k_t/k_p^2 = 0.0468 \pm 0.0133$  (best estimate  $\pm 1$  standard error). The probability that the true values of  $k_p$  and  $k_t$  fall between the dashed lines is approximately 70%.
